# Supplementary material
Source: publisher figshare collection journal article supplement (https://acs.figshare.com/ndownloader/files/13539092)
Supplement: Supplementary file 1 [file 13539092]

## **Efficient Electrocatalytic Proton Reduction with Carbon Nanotube-Supported Metal-Organic Frameworks**

Daniel Micheroni, Guangxu Lan, and Wenbin Lin\*

Department of Chemistry, The University of Chicago, Chicago, IL 60637, United States

Correspond author Email: [wenbinlin@uchicago.edu](mailto:wenbinlin@uchicago.edu)

### **Contents:**

|                                                  | Page |
|--------------------------------------------------|------|
| Materials, Synthesis, and Methods                | S2   |
| Material Characterization                        | S5   |
| CV Data                                          | S9   |
| Bulk Electrolysis Results                        | S13  |
| Stability Studies of Hf <sub>12</sub> -CoDBP/CNT | S16  |
| References                                       | S17  |

**Materials:** All reagents and solvents were purchased from commercial sources and used without further purification unless otherwise stated: methyl-4-formylbenzoate; dichloromethane, 2,3-dichloro-5,6-dicyano-1,4-benzoquinone (DDQ), triethylamine (TEA); trifluoroacetic acid (TFA), ethanol; sodium hydroxide; hydrochloric acid (HCl); hafnium chloride (HfCl<sub>4</sub>); acetic acid; dimethylformamide (DMF). CNTs functionalized with carboxylic acid groups were purchased from Chengdu Organic Chemistry Institute (China) while unfunctionalized CNTs were purchased from Aldrich.

### Synthesis of 5,15-di(*p*-methyl-benzoato)porphyrin (Me<sub>2</sub>DBP)<sup>1</sup>

Methyl-4-formylbenzoate (520 mg, 3.16 mmol) and dipyrromethane (463 mg, 3.16 mmol) were added to a round bottom flask. To the flask 500 mL of anhydrous dichloromethane was added and degassed for 30 minutes. Trifluoroacetic acid (0.5 mL, 6.47 mmol) was added dropwise via a syringe. The mixture was stirred at room temperature in the dark for four hours. To the reaction mixture, 2,3-dichloro-5,6-dicyano-1,4-benzoquinone (DDQ, 1085 mg, 4.74 mmol) was added and allowed to stir for an additional hour. The reaction was quenched with triethylamine (TEA, 8 mL, 57.3 mmol). The solvent was removed with a rotary evaporator and the resulting solid was purified on a silica column using a chloroform:ethyl acetate (9:1) eluent to give a deep purple solid as the product. Yield: 290 mg, 0.50 mmol (31.6%). <sup>1</sup>H-NMR (500MHz, chloroform-D, ppm): δ = 10.37 (s, 2H), 9.47 (d, 4H), 9.10 (d, 4H), 8.49 (d, 4H), 8.36 (d, 4H), 4.15 (s, 6H), -3.12 (s, 2H).

### Synthesis of 5, 15-di(*p*-benzoato)porphyrin (H<sub>2</sub>DBP)<sup>1</sup>

Me<sub>2</sub>DBP (290 mg, 0.50 mmol) was dissolved in a mixture of 1:1 ethanol and 6M aqueous NaOH. The solution was heated to reflux under nitrogen overnight. The solution was then cooled to room temperature and then acidified to pH = 2 with 2M hydrochloric acid. The solid was collected and washed via centrifugation three times with water and dried overnight under vacuum to afford the maroon product. Yield: 257 mg, 46.5 μmol (93% yield). <sup>1</sup>H-NMR (500MHz, dimethyl sulfoxide-D<sub>6</sub>, ppm): δ = 13.33 (s, 2H), 10.69 (s, 2H), 9.69 (d, 4H), 9.06 (d, 4H), 8.43 (m, 8H), -3.35 (s, 2H).

### Synthesis Hf<sub>12</sub>-CoDBP

H<sub>2</sub>DBP (1.5 mg, 2.7  $\mu$ mol), hafnium(IV) chloride (1.00 mg, 3.15  $\mu$ mol), and acetic acid (70  $\mu$ L, 1224  $\mu$ mol) were combined in 1.0 mL of dimethylformamide and heated at 85 °C oven for three days. A dark red powder was collected by centrifugation and washed with DMF three times. The MOF was then metalated with 4.05  $\mu$ mol of CoCl<sub>2</sub>·6H<sub>2</sub>O in 1 mL of DMF at 80 °C for 24 hours. The product was washed with DMF then ethanol twice and collected via centrifugation and stored in 0.5 mL of ethanol. Yield: 1.5 mg, mg (71.5%).

Alternatively, Hf<sub>12</sub>-CoDBP was prepared by heating a mixture of H<sub>2</sub>CoDBP (1.66 mg, 2.7  $\mu$ mol), hafnium(IV) chloride (1.00 mg, 3.15  $\mu$ mol), water (10  $\mu$ L  $\mu$ mol), and acetic acid (70  $\mu$ L, 1224  $\mu$ mol) in DMF at 85 °C for three days. Yield: 1.0 mg (47.7%).

### Synthesis of Hf<sub>12</sub>-CoDBP/CNT

H<sub>2</sub>CoDBP (1.66 mg, 2.7  $\mu$ mol), hafnium(IV) chloride (1.00 mg, 3.15  $\mu$ mol), 5 mg of carboxylated multi-walled carbon nanotubes, 10  $\mu$ L H<sub>2</sub>O, and acetic acid (70  $\mu$ L, 1224  $\mu$ mol) were combined in 1.0 mL of dimethylformamide and heated at 85 °C oven for three days. A black powder was collected by centrifugation and washed with DMF three times, ethanol twice, then stored in 0.5 mL of ethanol.

### Electrochemical Methods

All electrochemical experiments were performed using a Pine Instruments WaveDriver potentiostat (Model AFP2). Non-catalytic experiments were performed with 0.1 M TBAPF<sub>6</sub> serving as the electrolyte in acetonitrile that was degassed with nitrogen for at least thirty minutes. Electrochemical experiments in aqueous solutions were performed at pH = 1 with perchloric acid; the solution was degassed with nitrogen for at least thirty minutes. If the pH was increased, the electrolyte concentration was maintained at 0.1 ClO<sub>4</sub><sup>-</sup> using potassium perchlorate. Cyclic voltammetry (CV) measurements were performed in a standard three-electrode cell with a glassy carbon electrode (0.4 cm diameter) serving as the working electrode, silver/silver chloride electrode serving as the reference electrode (Calculated at 0.223 V vs the NHE from the Fe(CN)<sub>6</sub> redox couple), and a platinum counter electrode. Scan rates were 100 mV s<sup>-1</sup> unless stated otherwise and all experiments were collected underneath a nitrogen atmosphere. Controlled potential electrolysis was performed in the same setup as the CV except that the electrode was

spun at 400 RPM using the RDE assembly coupled with a stir bar at 400 RPM to prevent bubbles from building up on the working electrode surface.

### **GC Quantification**

All gas chromatography (GC) measurements were obtained using an Agilent 7890B GC system. 300  $\mu$ L of headspace gas of the reaction vessel (measured to be 177 mL) was injected post controlled potential electrolysis.

### **XPS Characterization**

X-ray photoelectron spectroscopy (XPS) data was collected using an AXIS Nova spectrometer (Kratos Analytical) with monochromatic Al K $\alpha$  Xray source. For this instrument, the Al anode was powered at 10 mA and 15kV. Instrument base pressure was ca.  $1 \times 10^{-9}$  Torr, and the analysis area size was  $0.3 \times 0.7$  mm<sup>2</sup>. For calibration purposes, the binding energies were referenced to the C 1s peak at 284.8 eV. Survey spectra were collected with a step size of 1 eV and a pass energy of 160 eV, while the cobalt region was collected with a step size of 0.1 eV.

### **ICP-MS Characterization**

ICP-MS data was obtained with an Agilent 7700x ICP-MS and analyzed using ICP-MS MassHunter version B01.03. Samples were diluted in a 2% HNO<sub>3</sub> matrix and analyzed with a <sup>159</sup>Tb internal standard against a 12-point standard curve over the range from 0.1 ppb to 500 ppb. The correlation was >0.9997 for all analyses of interest. Data collection was performed in spectrum Mode with five replicates per sample and 100 sweeps per replicate.

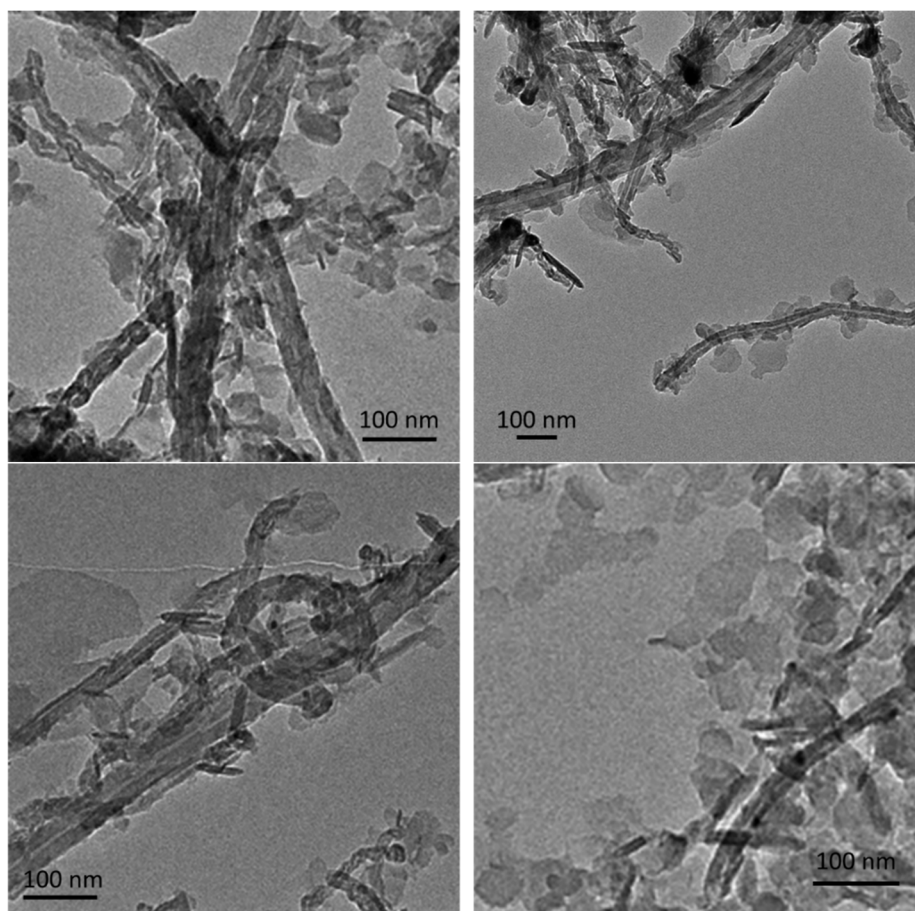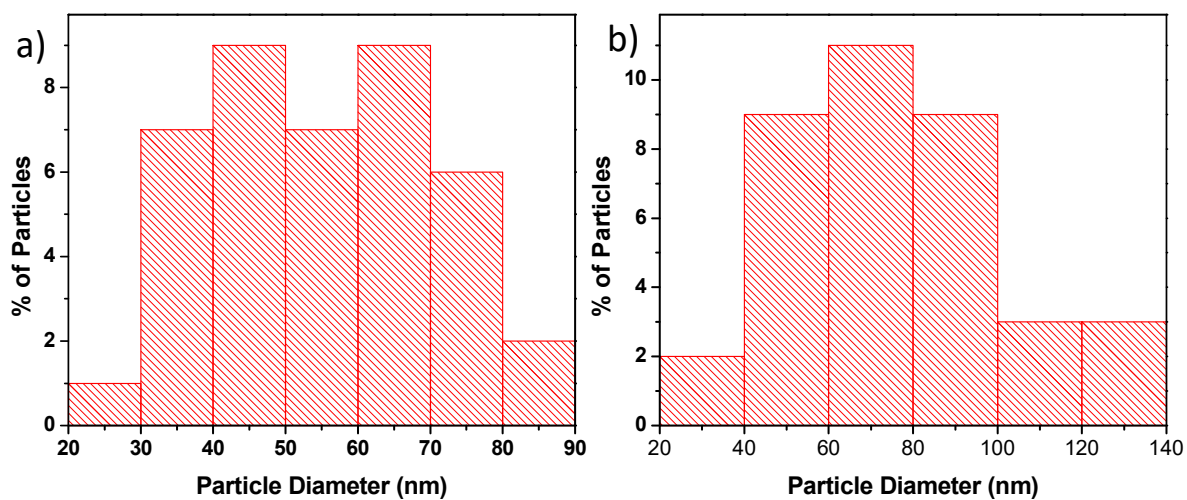

**Figure S1.** Histogram of the Hf<sub>12</sub>-CoDBP particle sizes from distinct samples, both (a) with and (b) without CNT functionalization as determined by TEM above and in the primary manuscript.

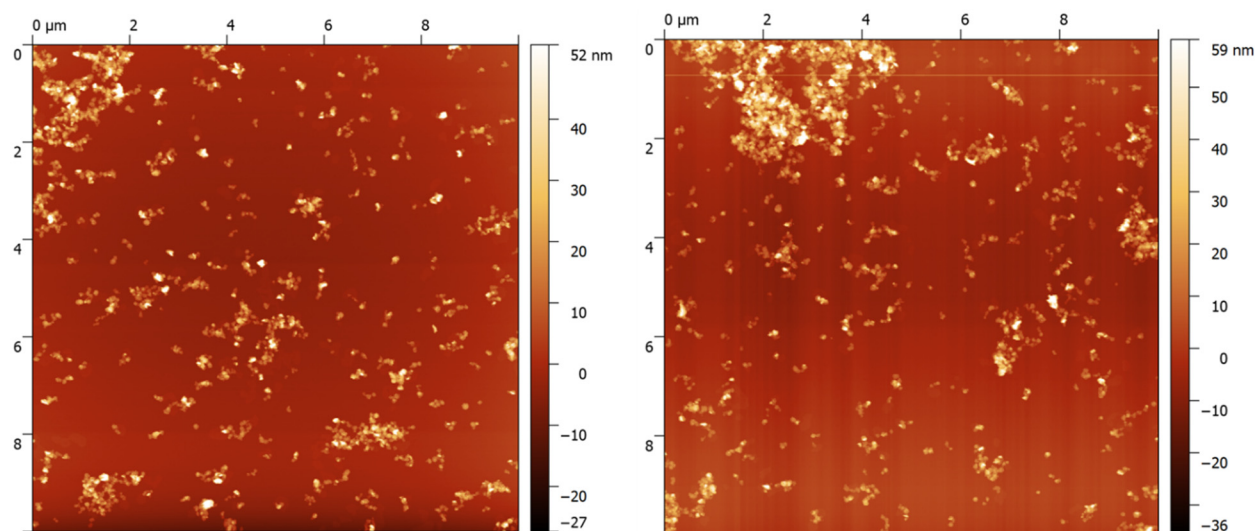

**Figure S2.** AFM images of two different Hf<sub>12</sub>-DBP samples show consistent shape and thickness ranging from 15 to 40 nm.

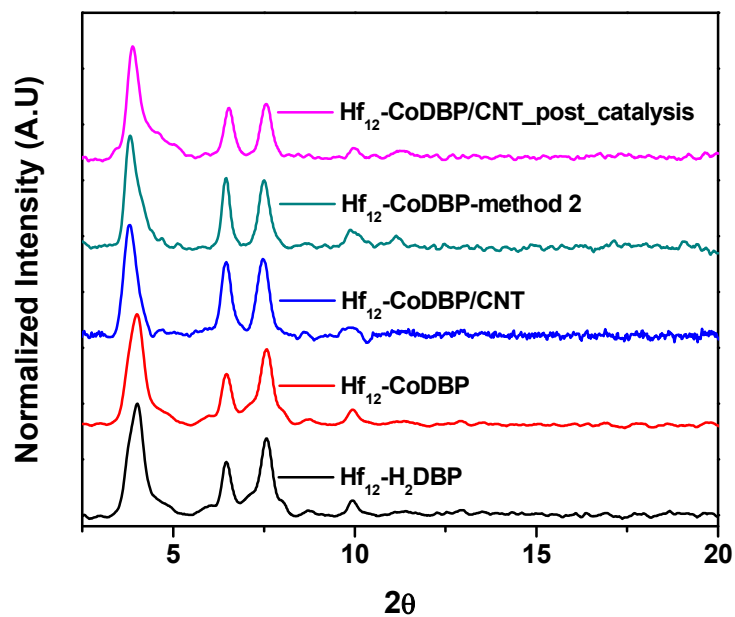

**Figure S3.** PXRD of Hf<sub>12</sub>-CoDBP/CNT (blue) showed identical peaks to Hf<sub>12</sub>-CoDBP (red and teal), and Hf<sub>12</sub>-H<sub>2</sub>DBP (black), indicating the Hf<sub>12</sub>-CoDBP grown on CNT had the same crystalline structure as the parent Hf<sub>12</sub>-CoDBP.

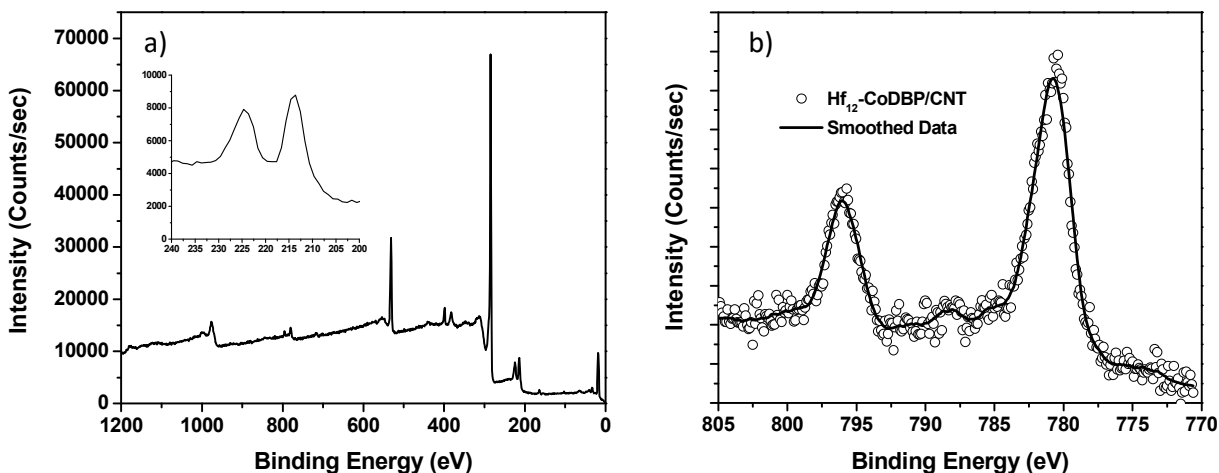

**Figure S4.** a) The XPS spectrum of Hf<sub>12</sub>-CoDBP/CNT was used to determine the Hf to Co ratio, with the inset graph showing the Hf4d<sub>3/2</sub> peak. b) The cobalt region of the XPS spectrum shows Co<sup>III</sup> oxidation state for Hf<sub>12</sub>-CoDBP/CNT. For XPS integration, relative sensitive factors (RSFs) of 33.12 and 66.88 were used for Co2p<sub>3/2</sub> and Hf4d<sub>3/2</sub> peaks, respectively.

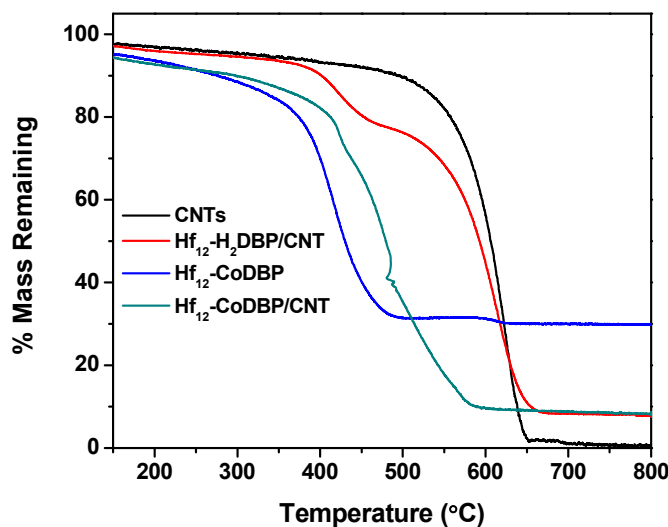

**Figure S5.** Comparison of TGA curves of Hf<sub>12</sub>-CoDBP/CNT, CNT, and Hf<sub>12</sub>-CoDBP shows that Hf<sub>12</sub>-CoDBP/CNT contains ~20 wt% Hf<sub>12</sub>-CoDBP with a Hf to H<sub>2</sub>DBP ligand ratio of 1.66:1 and a Hf to CoDBP ratio of 1.46:1.

The first weight at 385 to 470 °C (13.4 %) was assigned to the degradation of the porphyrin moiety into CO<sub>2</sub> and metal oxides. The second weight loss at 485 to 670 °C corresponds to the decomposition of the CNTs. The weight remaining (8.25%) at > 670 °C is attributed to HfO<sub>2</sub>. The

Hf to ligand ratio was determined from the percent weight loss of porphyrin compared to the percent HfO<sub>2</sub> remaining.

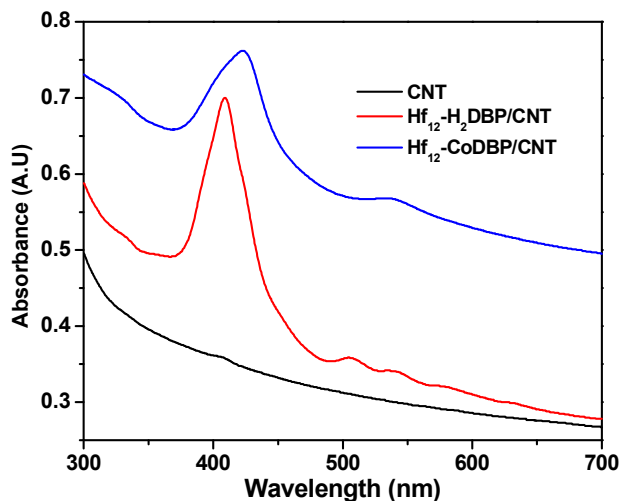

**Figure S6.** UV-Vis spectra of CNTs, Hf<sub>12</sub>-H<sub>2</sub>DBP/CNT and Hf<sub>12</sub>-CoDBP/CNT in DMF.

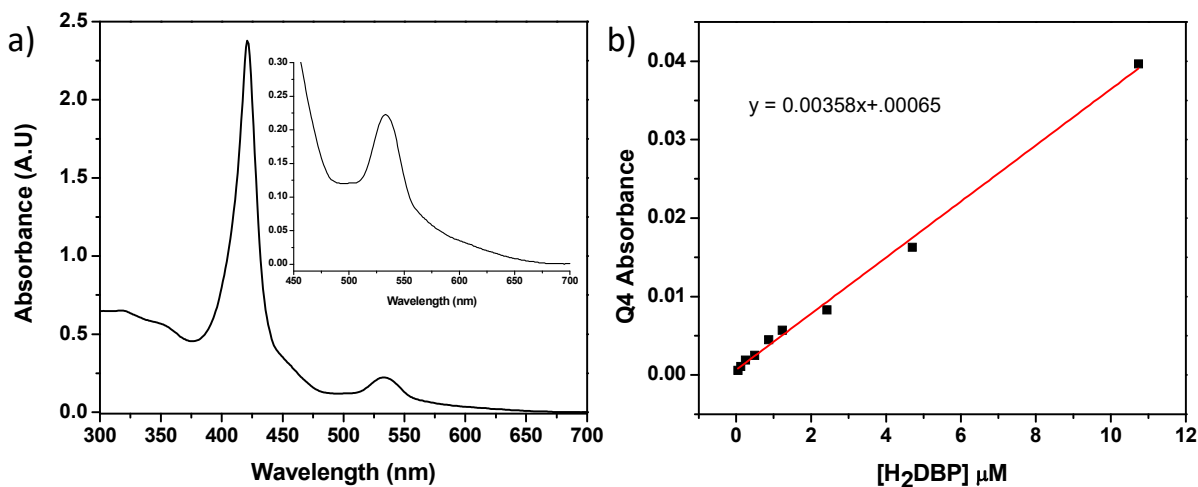

**Figure S7.** (a) UV-Vis spectrum of 40  $\mu$ M CoDBP taken from the Hf<sub>12</sub>-CoDBP growth solution. (b) The standard curve of the Q4 band for H<sub>2</sub>DBP showing a detection limit of <1  $\mu$ M. However, a slight shoulder in the CoDBP spectrum near the Q4 band makes it difficult to discern any H<sub>2</sub>DBP species of less than 10% CoDBP. The lack of discernible Q4 band of H<sub>2</sub>DBP in the 40  $\mu$ M CoDBP taken from the Hf<sub>12</sub>-CoDBP growth solution thus shows the less than 10% leaching of Co ions.



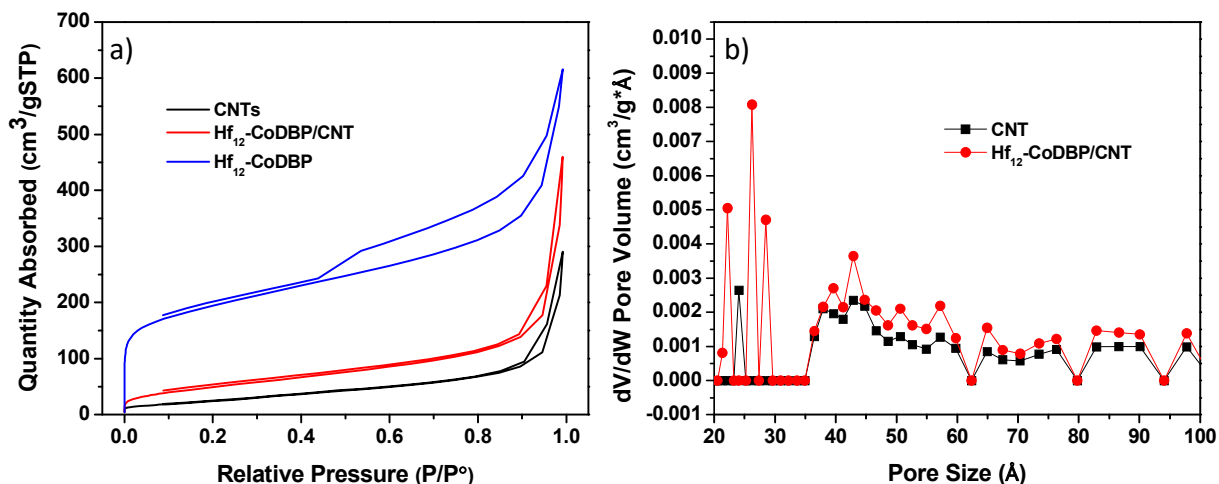

**Figure S8.** a) Nitrogen sorption isotherms for CNTs, Hf<sub>12</sub>-CoDBP, and Hf<sub>12</sub>-CoDBP/CNT afforded BET surface areas of 78.12 m<sup>2</sup>/g, 509.3 m<sup>2</sup>/g, and 115.14 m<sup>2</sup>/g, respectively. b) Pore size distribution of Hf<sub>12</sub>-CoDBP/CNT and CNTs as determined by the DFT method.

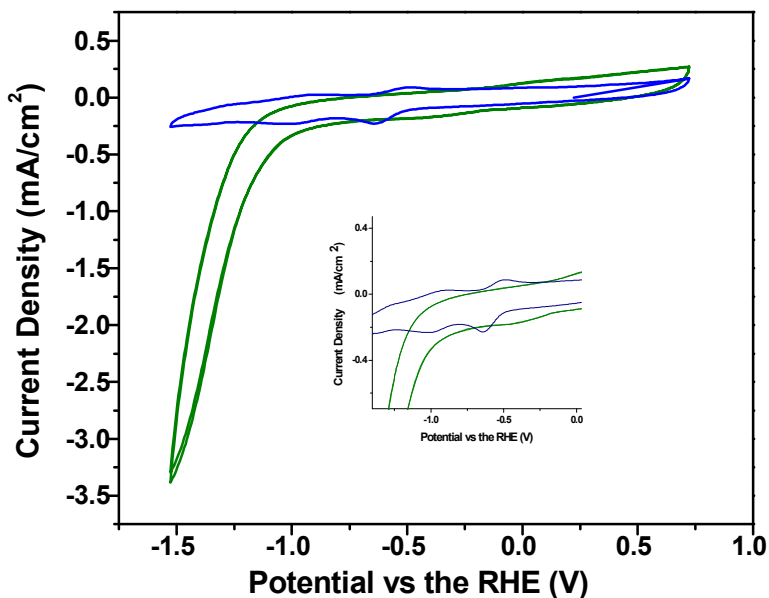

**Figure S9.** Cyclic voltammetry curves of Hf<sub>12</sub>-CoDBP/CNT in the presence of 0.026 M TFA in acetonitrile show proton reduction consistent with a Co<sup>I</sup>-H intermediate, vastly outperforming a bare glassy carbon electrode.

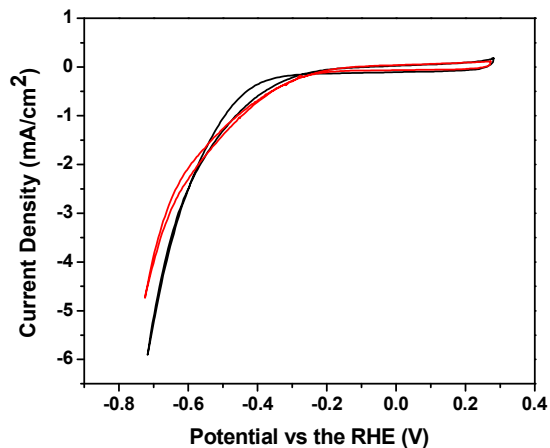

**Figure S10.** CV traces of Hf<sub>12</sub>-CoDBP/CNT/Nafion taken with a GCE counter electrode before (red) and after bulk electrolysis (black) in pH 1 perchloric acid.

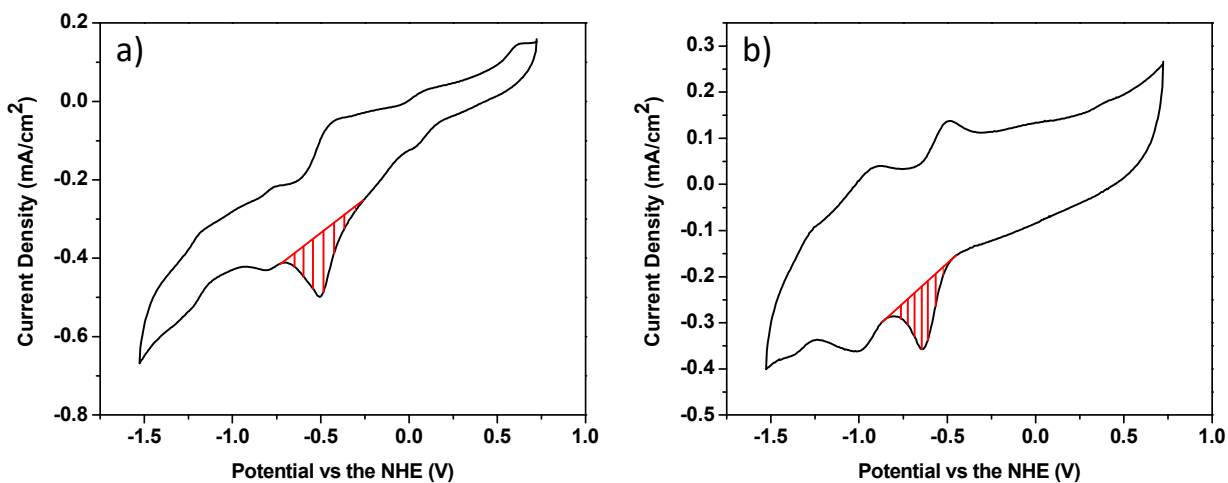

**Figure S11.** a) Comparison of the integrations of the first reductive peaks for Hf<sub>12</sub>-CoDBP and b) Hf<sub>12</sub>-CoDBP/CNT shows a 114-fold increase in the percent active sites for the Hf<sub>12</sub>-CoDBP/CNT material. For a), 0.28% of the 26.1 nmol of Co centers were reduced, while for b), 31.9% of the available 1.58 nmol Co centers were reduced.

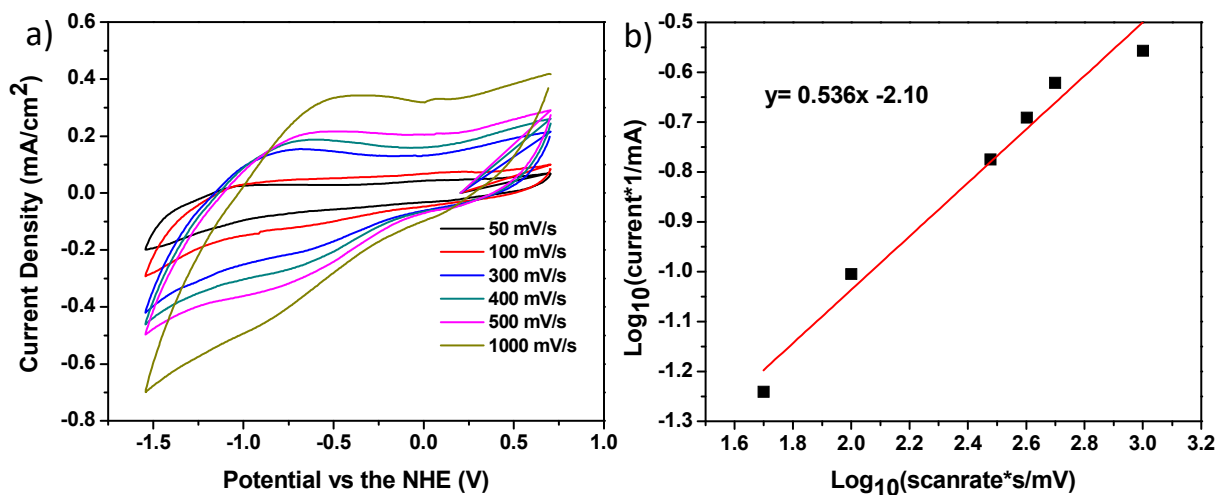

**Figure S12.** a) CV curves of Hf<sub>12</sub>-CoDBP/CNT in ACN at varying scan rates. b) A linear relationship between  $\log_{10}(\text{current in mA})$  and  $\log_{10}(\text{scan rate in mV/s})$  with a slope of 0.54 suggests electron transfer occurs via charge hopping to the cobalt center.

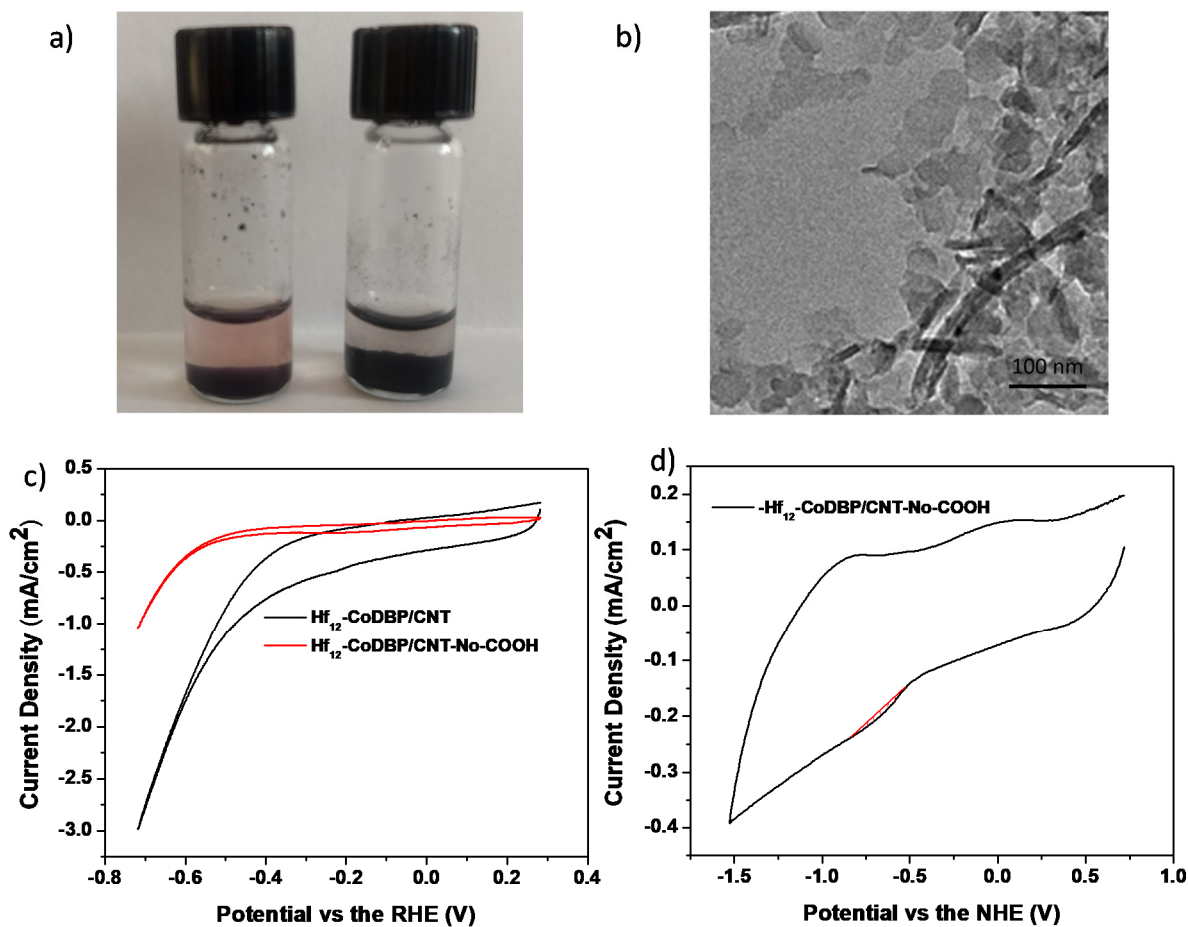

**Figure S13.** a) Hf<sub>12</sub>-CoDBP/non-carboxylated CNT (left) but not Hf<sub>12</sub>-CoDBP/CNT (right) showed the color of unbound Hf<sub>12</sub>-CoDBP in the supernatant. b) TEM image of Hf<sub>12</sub>-CoDBP/non-carboxylated CNT. c) CV curves of Hf<sub>12</sub>-CoDBP/CNT and Hf<sub>12</sub>-CoDBP/CNT-No-COOH. d) CV curves of Hf<sub>12</sub>-CoDBP/CNT-No-COOH.

carboxylated CNT. c) CV curve of Hf<sub>12</sub>-CoDBP/CNT and Hf<sub>12</sub>-CoDBP/non-carboxylated CNT at pH = 1 (HClO<sub>4</sub>). d) CV curve of Hf<sub>12</sub>-CoDBP/non-carboxylated CNT in 0.1 M TBAPF<sub>6</sub> dissolved in ACN shows that 0.29% of 1.81 nmol total Co on the electrode is electrochemically active.

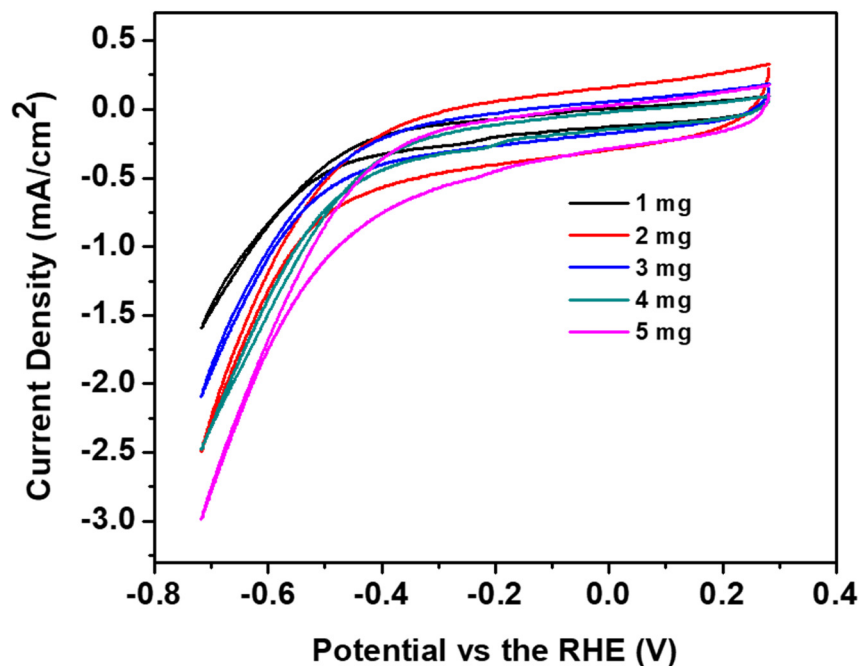

**Figure S14.** CV traces of 0.05 mg of Hf<sub>12</sub>-CoDBP/CNT/Nafion synthesized with 1 to 5 mg of CNTs and 1.7 mg of CoDBP in pH 1 perchloric acid solutions. Increasing currents due to increasing amounts of CNT indicate the important role of carboxylated CNT in electrocatalytic activity.

**Table S1:** The results of 30 minutes of controlled potential electrolysis at  $\eta = 715$  mV for various samples of Hf<sub>12</sub>-CoDBP/CNT/Nafion with variable CNT loading in pH 1 perchloric acid.

| Sample                          | $\eta$ (mV) | $\mu\text{MOL H}_2$<br>Produced | TON                | %Faradaic<br>Efficiency |
|---------------------------------|-------------|---------------------------------|--------------------|-------------------------|
| Hf <sub>12</sub> -CoDBP/1mg-CNT | 715         | 3.81                            | $8.20 \times 10^2$ | 64.8                    |
| Hf <sub>12</sub> -CoDBP/2mg-CNT | 715         | 4.44                            | $1.51 \times 10^3$ | 65.7                    |
| Hf <sub>12</sub> -CoDBP/3mg-CNT | 715         | 4.66                            | $2.82 \times 10^3$ | 70.3                    |
| Hf <sub>12</sub> -CoDBP/4mg-CNT | 715         | 6.29                            | $1.06 \times 10^4$ | 85.3                    |
| Hf <sub>12</sub> -CoDBP/5mg-CNT | 715         | 5.94                            | $3.80 \times 10^3$ | 80.0                    |

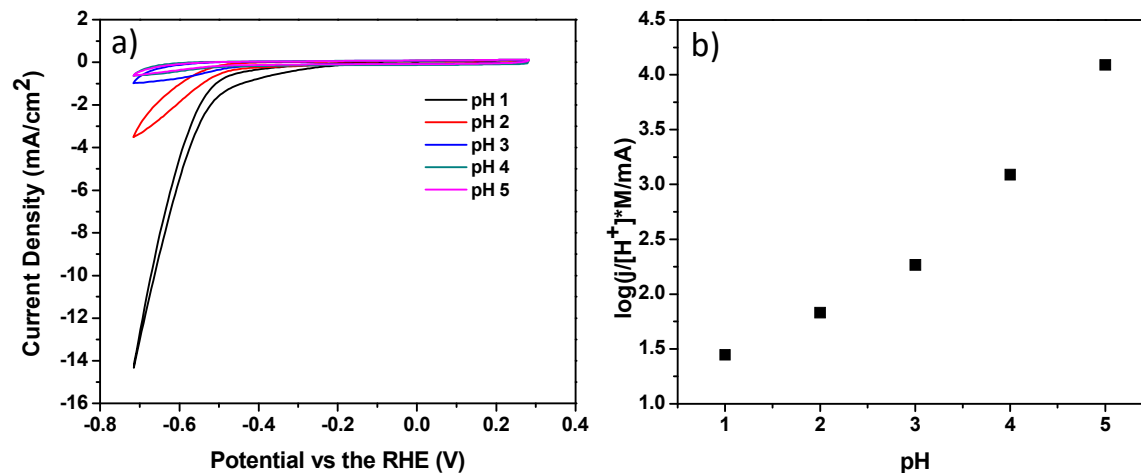

**Figure S15.** a) CV traces of Hf<sub>12</sub>-CoDBP/CNT at varying pHs and b) the recorded current at  $\eta = 715$  mV divided by proton concentration shows enhanced activity at higher pH values, indicating non-first order kinetics.

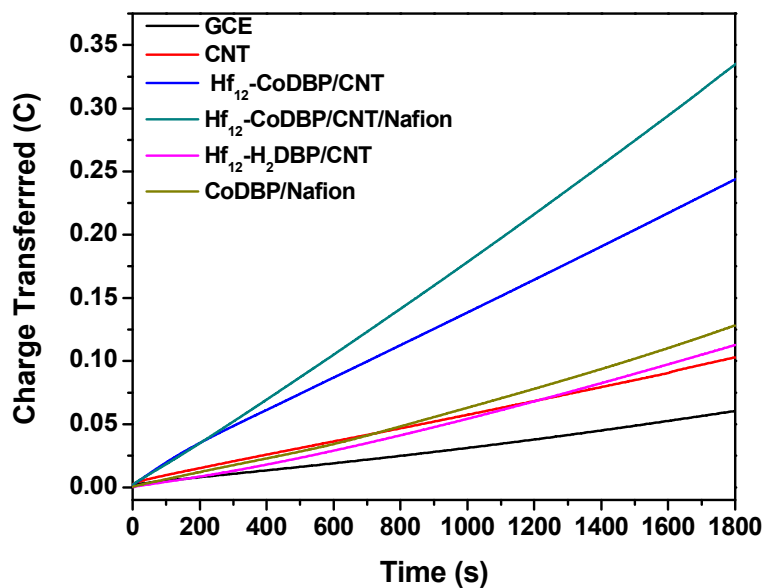

**Figure S16.** Controlled potential electrolysis of Hf<sub>12</sub>-CoDBP/CNT and Hf<sub>12</sub>-CoDBP/CNT/Nafion outperform their controls at a  $\eta$  of 515 mV vs the RHE at pH = 1 (perchloric acid).

**Table S2:** The results of controlled potential electrolysis at varying potentials show the functionalized Hf<sub>12</sub>-CoDBP materials outperform the controls in both activity and Faradaic efficiency.

| Sample                                   | $\eta$ (mV) | $\mu\text{MOL H}_2$<br>Produced | %Faradaic<br>Efficiency |
|------------------------------------------|-------------|---------------------------------|-------------------------|
| GCE                                      | 515         | 0.084                           | 38.7                    |
| CNT                                      | 515         | 0.0593                          | 14.1                    |
| CoDBP/Nafion                             | 55          | 0.421                           | 81.7                    |
| Hf <sub>12</sub> -CoDBP/CNT              | 515         | 0.878                           | 71.1                    |
| Hf <sub>12</sub> -CoDBP/CNT/Nafion       | 515         | 1.41                            | 82.9                    |
| Hf <sub>12</sub> -H <sub>2</sub> DBP/CNT | 515         | 0.154                           | 3.0                     |
| GCE                                      | 715         | 1.13                            | 45.8                    |
| CNT                                      | 715         | 1.88                            | 12.9                    |
| CoDBP/Nafion                             | 715         | 1.59                            | 43.1                    |
| Hf <sub>12</sub> -CoDBP/CNT              | 715         | 10.33                           | 93.2                    |
| Hf <sub>12</sub> -CoDBP/CNT/Nafion       | 715         | 16.39                           | 83.5                    |
| Hf <sub>12</sub> -H <sub>2</sub> DBP/CNT | 715         | 3.39                            | 36.8                    |

**Table S3:** The efficiency of porphyrin and cobalt-containing electrocatalysts for HER.

| Sample                                            | Solvent                                  | Ref.<br>Electrode | H <sup>+</sup> Source      | Potential<br>(V) | TON   | % F.E |
|---------------------------------------------------|------------------------------------------|-------------------|----------------------------|------------------|-------|-------|
| FeTPP <sup>2</sup>                                | DMF                                      | SCE               | TEA-H <sup>+</sup>         | -1.60            | 22    | > 95  |
| CoPc <sup>3</sup>                                 | H <sub>3</sub> PO <sub>4</sub> , pH<br>1 | AgCl              | H <sup>+</sup>             | -0.9             | 20000 | N/A   |
| CoTMAP <sup>4</sup>                               | H <sub>2</sub> O                         | SCE               | 0.1 M<br>TFA               | -0.95            | N/A   | > 90  |
| CoTPPS <sup>5</sup>                               | 2M Kpi<br>(aq)                           | SHE               | H <sub>2</sub> O, pH<br>7  | -1.29            | 725   | > 95  |
| CoP <sup>6</sup>                                  | PO <sub>4</sub> <sup>3-</sup> , pH 7     | SCE               | Benzoic<br>acid            | -1.30            | n/a   | n/a   |
| Co(dmgbF <sub>2</sub> ) <sub>2</sub> <sup>7</sup> | ACN                                      | SCE               | HCl                        | -0.37 V          | 11    | 90    |
| Cobalt<br>Tetraazamacrocyclic <sup>8</sup>        | NaClO <sub>4</sub><br>(aq)               | SCE               | H <sup>+</sup> , pH<br>2.2 | -0.93            | 22    | 81    |
| CoPY5Me <sub>2</sub> <sup>9</sup>                 | PO <sub>4</sub> <sup>3-</sup> , pH 7     | SHE               | H <sub>2</sub> O           | -1.30            | 55000 | 100   |
| CoPY4 <sup>10</sup>                               | H <sub>2</sub> O/ACN                     | SCE               | TFA                        | N/A              | 40    | N/A   |
| Co(mnt) <sub>2</sub> <sup>11</sup>                | H <sub>2</sub> O/ACN                     | SCE               | Ascorbic<br>acid, pH 4     | -1.37            | 3450  | N/A   |
| CoMP11-AC <sup>12</sup>                           | H <sub>2</sub> O                         | Ag/AgCl           | H <sub>2</sub> O           | -1.5             | 25000 | > 95  |

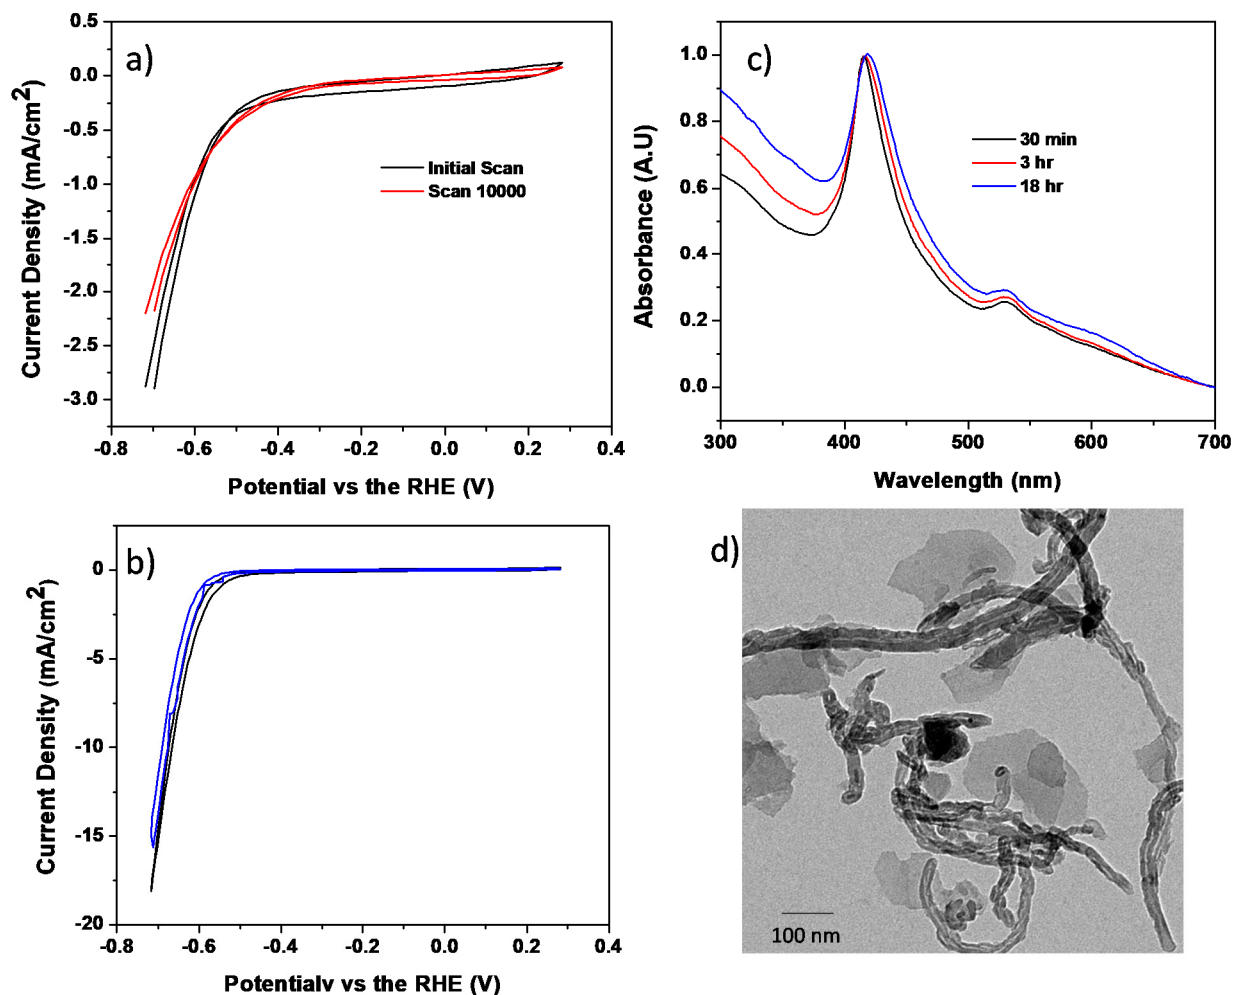

**Figure S17.** a) Hf<sub>12</sub>-CoDBP/CNT/Nafion shows consistent CV curves after 10,000 CV scans and b) after 30 minutes of controlled potential electrolysis at 715 mV vs the RHE in pH = 1 HClO<sub>4</sub>. c) Hf<sub>12</sub>-CoDBP/CNT/Nafion shows no change in its UV-Visible spectra after bulk electrolysis at  $\eta = 615$  mV for various time lengths, d) Hf<sub>12</sub>-CoDBP/CNT/Nafion shows no Co nanoparticle formation in the TEM after electrolysis at an overpotential of 715 mV for one hour.



## References:

- (1) Lu, K.; He, C.; Lin, W., Nanoscale Metal-Organic Framework for Highly Effective Photodynamic Therapy of Resistant Head and Neck Cancer. *J. Am. Chem. Soc.* **2014**, *136* (48), 16712-16715.
- (2) Bhugun, I.; Lexa, D.; Saveant, J.-M., Homogeneous Catalysis of Electrochemical Hydrogen Evolution by Iron(0) Porphyrins. *J. Am. Chem. Soc.* **1996**, *118* (16), 3982-3.
- (3) Zhao, F.; Zhang, J.; Abe, T.; Wohrle, D.; Kaneko, M., Electrocatalytic proton reduction by phthalocyanine cobalt derivatives incorporated in poly(4-vinylpyridine-co-styrene) film. *J. Mol. Catal. A Chem.* **1999**, *145* (1-2), 245-256.
- (4) Kellett, R. M.; Spiro, T. G., Cobalt(II) porphyrin catalysts of hydrogen production from water. *Inorg. Chem.* **1985**, *24* (15), 2373-7.
- (5) Beyene, B. B.; Mane, S. B.; Hung, C.-H., Highly efficient electrocatalytic hydrogen evolution from neutral aqueous solution by a water-soluble anionic cobalt(II) porphyrin. *Chem. Commun. (Cambridge, U. K.)* **2015**, *51* (81), 15067-15070.
- (6) Natali, M.; Luisa, A.; Iengo, E.; Scandola, F., Efficient photocatalytic hydrogen generation from water by a cationic cobalt(II) porphyrin. *Chem. Commun. (Cambridge, U. K.)* **2014**, *50* (15), 1842-1844.
- (7) Hu, X.; Cossairt, B. M.; Brunschwig, B. S.; Lewis, N. S.; Peters, J. C., Electrocatalytic hydrogen evolution by cobalt difluoroboryl-diglyoximate complexes. *Chem. Commun. (Cambridge, U. K.)* **2005**, (37), 4723-4725.
- (8) McCrory, C. C. L.; Uyeda, C.; Peters, J. C., Electrocatalytic Hydrogen Evolution in Acidic Water with Molecular Cobalt Tetraazamacrocycles. *J. Am. Chem. Soc.* **2012**, *134* (6), 3164-3170.
- (9) Sun, Y.; Bigi, J. P.; Piro, N. A.; Tang, M. L.; Long, J. R.; Chang, C. J., Molecular Cobalt Pentapyridine Catalysts for Generating Hydrogen from Water. *J. Am. Chem. Soc.* **2011**, *133* (24), 9212-9215.
- (10) Bigi, J. P.; Hanna, T. E.; Harman, W. H.; Chang, A.; Chang, C. J., Electrocatalytic reduction of protons to hydrogen by a water-compatible cobalt polypyridyl platform. *Chem. Commun. (Cambridge, U. K.)* **2010**, *46* (6), 958-960.
- (11) McNamara, W. R.; Han, Z.; Yin, C.-J.; Brennessel, W. W.; Holland, P. L.; Eisenberg, R., Cobalt-dithiolene complexes for the photocatalytic and electrocatalytic reduction of protons in aqueous solutions. *Proc. Natl. Acad. Sci. U. S. A.* **2012**, *109* (39), 15594-15599, S15594/1-S15594/8.
- (12) Kleingardner, J. G.; Kandemir, B.; Bren, K. L., Hydrogen Evolution from Neutral Water under Aerobic Conditions Catalyzed by Cobalt Microperoxidase-11. *J. Am. Chem. Soc.* **2014**, *136* (1), 4-7.
